# Supplementary material for: Recurrent Viral Capture of Cellular Phosphodiesterases that Antagonize OAS-RNase L
Source: PubMed Central journal article supplement (PMC10515750; doi:10.1101/2023.05.12.540623), 2023-09-14
Supplement: NIHPP2023.05.12.540623V2-supplement-1.pdf [file NIHPP2023.05.12.540623V2-supplement-1.pdf]

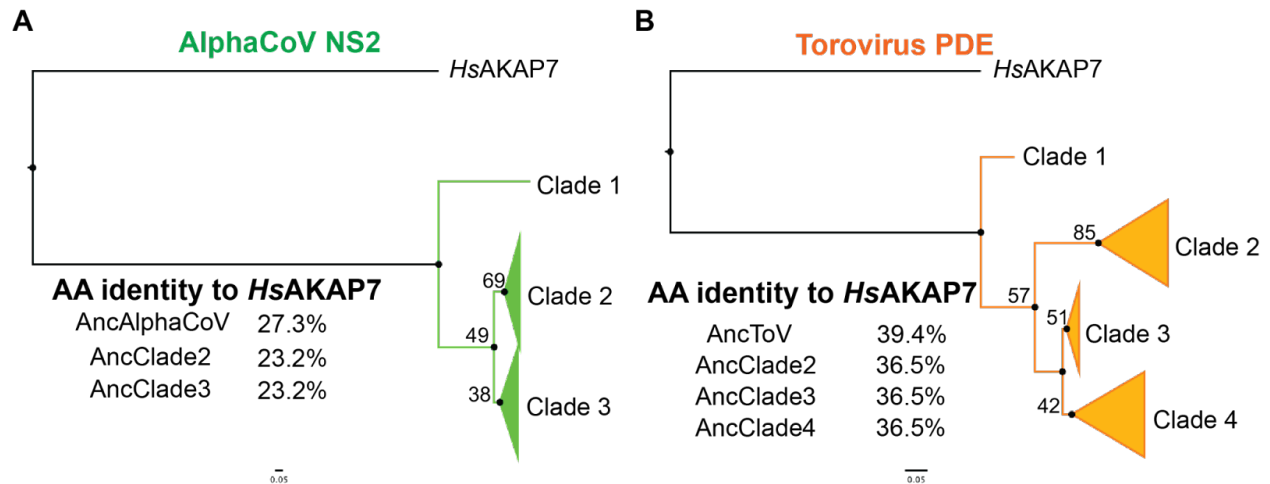

**Figure S2. Ancestral sequence reconstruction (ASR) of Alphacoronavirus and Torovirus PDEs.** A) ML tree of 10 Alphacoronavirus PDE sequences, collapsed into major clades, rooted with the *HsAKAP7* PDE domain sequence (AA 82-287) and sequence identity to *HsAKAP7* of reconstructed sequences at major nodes. B) ML tree of 18 Torovirus PDE sequences, collapsed into major clades, rooted with the *HsAKAP7* PDE domain sequence (AA 82-287) and sequence identity to *HsAKAP7* of reconstructed sequences at major nodes.
